# Supplementary material for: Predicting Symptomatic Cardiotoxicity in HER2-Positive Breast Cancer Patients Treated with Trastuzumab: Insights from a Brazilian Real-World Cohort
Source: Research Square preprint supplement (doi:10.21203/rs.3.rs-7093569/v1), 2025-07-23
Supplement: Supplementary file 1 [file d1ade0acbaafa02ca36f3901.docx]

**Supplementary files**


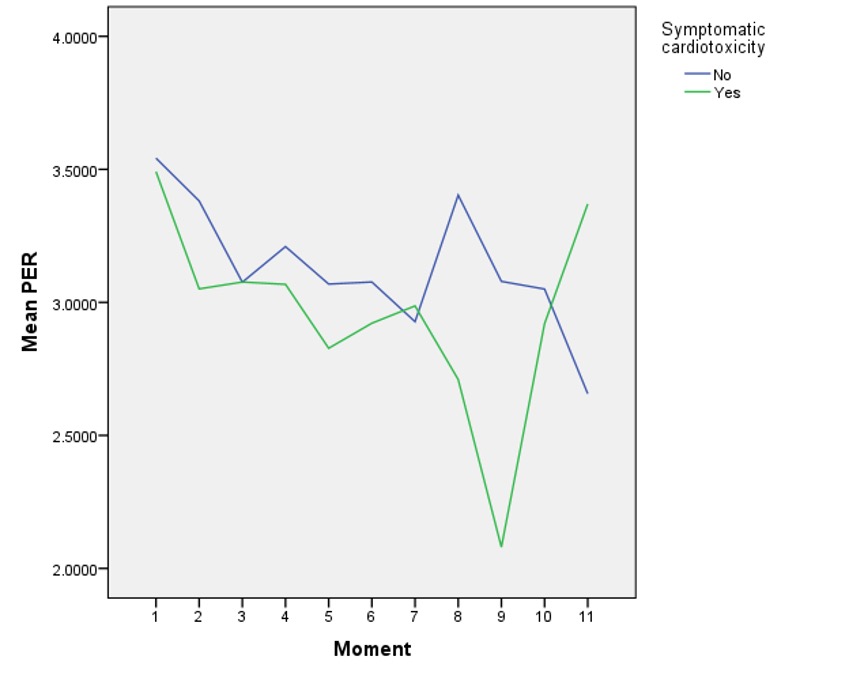
A

B

| **Moments** | **The mean PER (Wald confidence interval)** | | | | |  | ***p*** |
| --- | --- | --- | --- | --- | --- | --- | --- |
|  | **Asymptomatic** | |  | **Symptomatic cardiotoxicity** | |  |  |
|  |  |  |  |  |  |  |  |
| **1** | 3.54 (3.41 - 3.66) | |  | 3.49 (3.11 - 3.86) | |  | 0.802 |
|  |  |  |  |  |  |  |  |
| **2** | 3.38 (3.26 - 3.50) | |  | 3.05 (2.66 - 3.43) | |  | 0.107 |
|  |  |  |  |  |  |  |  |
| **3** | 3.07 (2.97 - 3.17) | |  | 3.07 (2.76 - 3.38) | |  | 0.997 |
|  |  |  |  |  |  |  |  |
| **4** | 3.20 (3.09 - 3.32) | |  | 3.06 (2.48 - 3.64) | |  | 0.638 |
|  |  |  |  |  |  |  |  |
| **5** | 3.06 (2.92 - 3.20) | |  | 2.82 (2.38 - 3.27) | |  | 0.313 |
|  |  |  |  |  |  |  |  |
| **6** | 3.07 (2.91 - 3.23) | |  | 2.92 (2.32 - 3.51) | |  | 0.622 |
|  |  |  |  |  |  |  |  |
| **7** | 2.92 (2.77- 3.07) | |  | 2.98 (2.71 - 3.25) | |  | 0.706 |
|  |  |  |  |  |  |  |  |
| **8** | 3.40 (3.05 - 3.74) | |  | 2.71 (2.64 - 2.77) | |  | **< 0.001** |
|  |  |  |  |  |  |  |  |
| **9** | 3.07 (2.79 - 3.36) | |  | 2.08 (2.08 - 2.08) | |  | **< 0.001** |
|  |  |  |  |  |  |  |  |
| **10** | 3.05 (2.60 - 3.49) | |  | 2.92 (2.92 - 2.92) | |  | 0.569 |
|  |  |  |  |  |  |  |  |
| **11** | 2.65 (2.44 - 2.87) | |  | 3.37 (3.37 - 3.37) | |  | **< 0.001** |
|  |  |  |  |  |  |  |  |

**Supplementary 1:** Longitudinal changes in Mean PER by symptomatic cardiotoxicity status, analyzed by GEE method. A – The mean PER’s curve; B – Table showing the mean of PER’s values; Nº – number; in bold, *p* < 0.05.

A


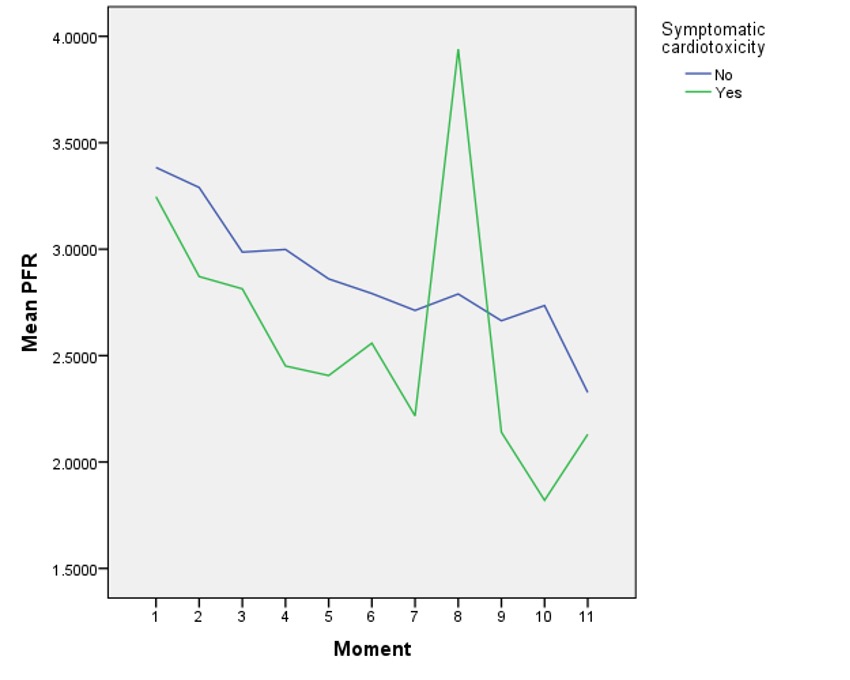


B

| **Moments** | **The mean PFR (Wald confidence interval)** | | | | |  | ***p*** |
| --- | --- | --- | --- | --- | --- | --- | --- |
|  | **Asymptomatic** | |  | **Symptomatic cardiotoxicity** | |  |  |
|  |  |  |  |  |  |  |  |
| **1** | 3.38 (3.24 - 3.52) | |  | 3.24 (2.77 - 3.71) | |  | 0.584 |
|  |  |  |  |  |  |  |  |
| **2** | 3.28 (3.15 - 3.42) | |  | 2.87 (2.52 - 3.21) | |  | **0.026** |
|  |  |  |  |  |  |  |  |
| **3** | 2.98 (2.85 - 3.11) | |  | 2.81 (2.45 - 3.17) | |  | 0.380 |
|  |  |  |  |  |  |  |  |
| **4** | 2.99 (2.85 - 3.14) | |  | 2.45 (2.29 - 2.60) | |  | **< 0.001** |
|  |  |  |  |  |  |  |  |
| **5** | 2.86 (2.72 - 2.99) | |  | 2.40 (2.11- 2.69) | |  | **0.005** |
|  |  |  |  |  |  |  |  |
| **6** | 2.79 (2.62 - 2.96) | |  | 2.55 (2.22 - 2.88) | |  | 0.622 |
|  |  |  |  |  |  |  |  |
| **7** | 2.71 (2.46- 2.95) | |  | 2.21 (1.92 - 2.50) | |  | **0.011** |
|  |  |  |  |  |  |  |  |
| **8** | 2.78 (2.43 - 3.14) | |  | 3.94 (1.79- 6.08) | |  | 0.300 |
|  |  |  |  |  |  |  |  |
| **9** | 2.66 (2.41 - 2.91) | |  | 2.14 (2.14 - 2.14) | |  | **< 0.001** |
|  |  |  |  |  |  |  |  |
| **10** | 2.73 (2.52- 2.94) | |  | 1.82 (1.82 - 1.82) | |  | **< 0.001** |
|  |  |  |  |  |  |  |  |
| **11** | 2.32 (1.97 - 2.68) | |  | 2.13 (2.13 - 2.13) | |  | 0.279 |
|  |  |  |  |  |  |  |  |

**Supplementary 2:** Longitudinal changes in Mean PFR by symptomatic cardiotoxicity status, analyzed by GEE method. A – The mean PFR’s curve; B – Table showing the mean of PFR’s values; Nº – number; in bold, *p* < 0.05.

A


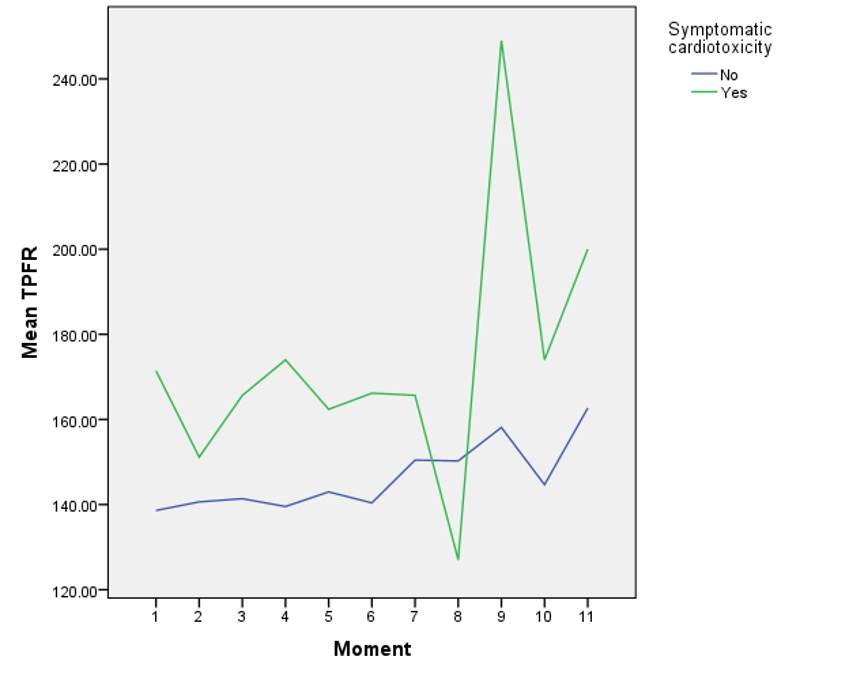


B

| **Moments** | **The mean TPFR (Wald confidence interval)** | | | | |  | ***p*** |
| --- | --- | --- | --- | --- | --- | --- | --- |
|  | **Asymptomatic** | |  | **Symptomatic cardiotoxicity** | |  |  |
|  |  |  |  |  |  |  |  |
| **1** | 138.61 (131.90 - 145.32) | |  | 171.42 (140.25 - 202.60) | |  | **0.044** |
|  |  |  |  |  |  |  |  |
| **2** | 140.62 (134.85 - 146.38) | |  | 151.14 (132.23 - 170.05) | |  | 0.297 |
|  |  |  |  |  |  |  |  |
| **3** | 141.37 (135.30 - 147.45) | |  | 165.64 (143.83 - 187.45) | |  | **0.036** |
|  |  |  |  |  |  |  |  |
| **4** | 139.54 (132.90 - 146.17) | |  | 174.00 (141.97 - 206.03) | |  | **0.039** |
|  |  |  |  |  |  |  |  |
| **5** | 142.97 (135.54 - 150.40) | |  | 162.37 (125.52- 199.22) | |  | 0.312 |
|  |  |  |  |  |  |  |  |
| **6** | 140.38 (130.70 - 150.07) | |  | 166.16 (138.25 - 194.08) | |  | 0.087 |
|  |  |  |  |  |  |  |  |
| **7** | 150.44 (133.75- 167.13) | |  | 165.66 (153.96 - 177.36) | |  | 0.143 |
|  |  |  |  |  |  |  |  |
| **8** | 150.25 (131.63 - 168.86) | |  | 127.00 (100.66 - 153.33) | |  | 0.158 |
|  |  |  |  |  |  |  |  |
| **9** | 158.11 (138.21 - 178.01) | |  | 249.00 (249.00 - 249.00) | |  | **< 0.001** |
|  |  |  |  |  |  |  |  |
| **10** | 144.66 (119.91 - 169.42) | |  | 174.00 (174.00 - 174.00) | |  | **< 0.001** |
|  |  |  |  |  |  |  |  |
| **11** | 162.66 (132.78 - 192.55) | |  | 200.00 (200.00 - 200.00) | |  | **0.014** |
|  |  |  |  |  |  |  |  |

**Supplementary 3:** Longitudinal changes in Mean TPFR by symptomatic cardiotoxicity status, analyzed by GEE method. A – The mean TPFR’s curve; B – Table showing the mean of TPFR’s values; Nº – number; in bold, *p* < 0.05.

A


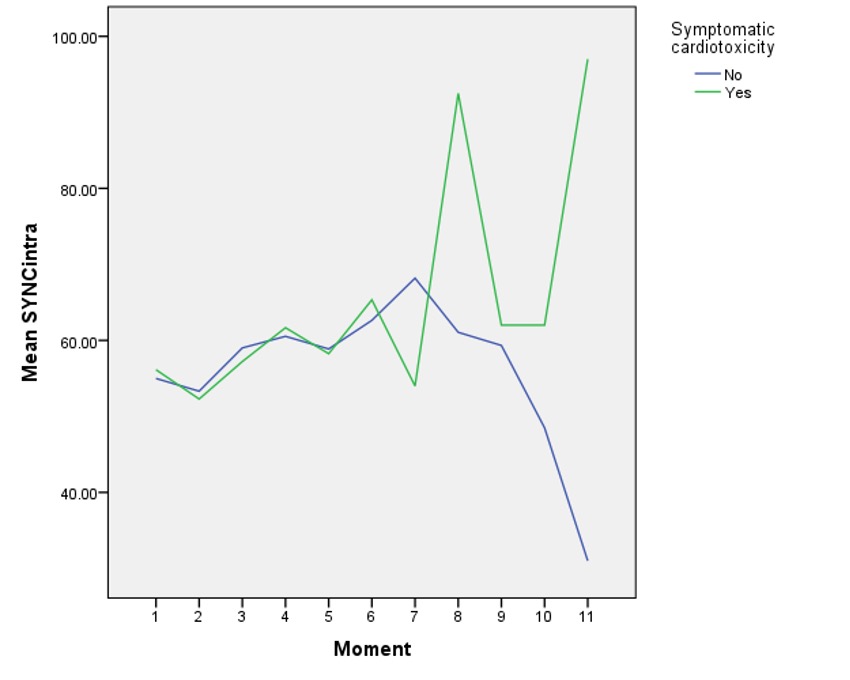


B

| **Moments** | **The mean SD LVmPA (Wald confidence interval)** | | | | |  | ***p*** |
| --- | --- | --- | --- | --- | --- | --- | --- |
|  | **Asymptomatic** | |  | **Symptomatic cardiotoxicity** | |  |  |
|  |  |  |  |  |  |  |  |
| **1** | 54.99 (50.10 - 59.88) | |  | 56.14 (45.39 - 66.88) | |  | 0.848 |
|  |  |  |  |  |  |  |  |
| **2** | 53.31 (48.46 - 58.16) | |  | 52.28 (39.77 - 64.79) | |  | 0.888 |
|  |  |  |  |  |  |  |  |
| **3** | 59.00 (54.06 - 63.95) | |  | 57.21 (50.35 - 64.07) | |  | 0.677 |
|  |  |  |  |  |  |  |  |
| **4** | 60.53 (55.47 - 65.59) | |  | 61.66 (52.01 - 71.31) | |  | 0.838 |
|  |  |  |  |  |  |  |  |
| **5** | 58.86 (53.30 - 64.43) | |  | 58.25 (46.47- 70.02) | |  | 0.926 |
|  |  |  |  |  |  |  |  |
| **6** | 62.63 (55.55 - 69.70) | |  | 65.33 (54.22 - 76.44) | |  | 0.688 |
|  |  |  |  |  |  |  |  |
| **7** | 68.18 (53.63 - 82.73) | |  | 54.00 (38.73 - 69.26) | |  | 0.187 |
|  |  |  |  |  |  |  |  |
| **8** | 61.06 (49.26 - 72.85) | |  | 92.50 (58.54 - 126.45) | |  | 0.087 |
|  |  |  |  |  |  |  |  |
| **9** | 59.33 (47.58 - 71.08) | |  | 62.00 (62.00 - 62.00) | |  | 0.657 |
|  |  |  |  |  |  |  |  |
| **10** | 48.50 (33.90 - 63.09) | |  | 62.00 (62.00 - 62.00) | |  | 0.070 |
|  |  |  |  |  |  |  |  |
| **11** | 31.00 (5.12 - 56.87) | |  | 97.00 (97.00 - 97.00) | |  | **< 0.001** |
|  |  |  |  |  |  |  |  |

**Supplementary 4:** Longitudinal changes in Mean SD LVmPA by symptomatic cardiotoxicity status, analyzed by GEE method. A – The mean SD LVmPA’s curve; B – Table showing the mean of SD LVmPA’s values; Nº – number; in bold, *p* < 0.05.

A


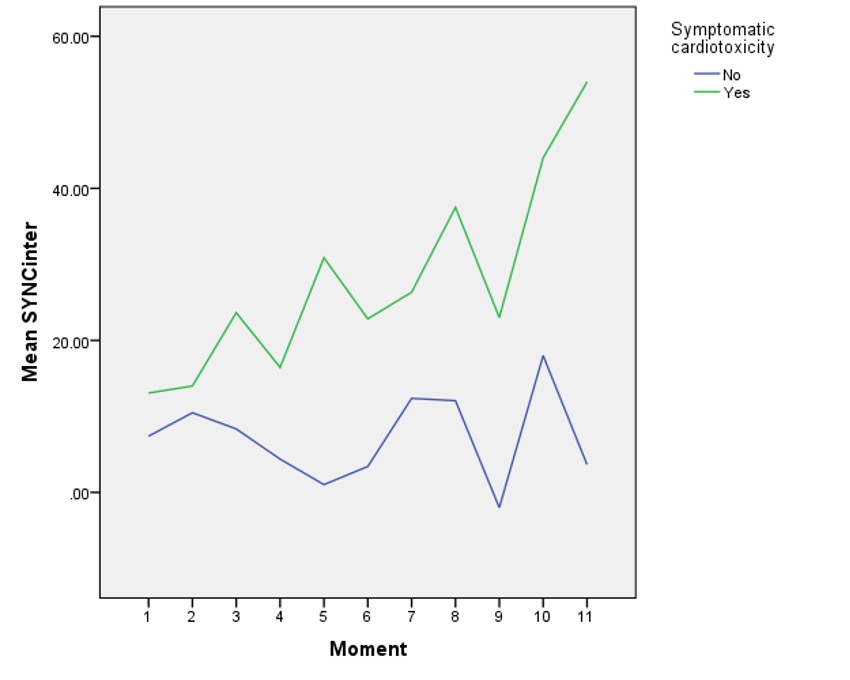


B

| **Moments** | **The mean LV-RVmPA (Wald Confidence Interval)** | | | | |  | ***p*** |
| --- | --- | --- | --- | --- | --- | --- | --- |
|  | **Asymptomatic** | |  | **Symptomatic cardiotoxicity** | |  |  |
|  |  |  |  |  |  |  |  |
| **1** | 7.39 (1.38 - 13.40) | |  | 13.07 (-0.82 - 26.97) | |  | 0.462 |
|  |  |  |  |  |  |  |  |
| **2** | 10.47 (4.17 - 16.77) | |  | 14.00 (-5.25 - 33.25) | |  | 0.733 |
|  |  |  |  |  |  |  |  |
| **3** | 8.35 (1.73 - 14.96) | |  | 23.64 (-0.78 - 48.06) | |  | 0.236 |
|  |  |  |  |  |  |  |  |
| **4** | 4.38 (-2.57 - 11.34) | |  | 16.44 (-3.20 - 36.09) | |  | 0.257 |
|  |  |  |  |  |  |  |  |
| **5** | 1.02 (-7.68 - 9.73) | |  | 530.87 (13.40 - 48.34) | |  | **0.003** |
|  |  |  |  |  |  |  |  |
| **6** | 3.40 (-5.78 - 12.59) | |  | 22.83 (-8.37 - 54.04) | |  | 0.242 |
|  |  |  |  |  |  |  |  |
| **7** | 12.37 (-1.09 - 25.83) | |  | 26.33 (1.84 - 50.81) | |  | 0.327 |
|  |  |  |  |  |  |  |  |
| **8** | 12.06 (-7.37 - 31.49) | |  | 37.50 (-14.47 - 89.47) | |  | 0.369 |
|  |  |  |  |  |  |  |  |
| **9** | -2.00 (-24.68 - 20.67) | |  | 23.00 (23.00 - 23.00) | |  | **0.031** |
|  |  |  |  |  |  |  |  |
| **10** | 18.00 (14.24 - 21.57) | |  | 44.00 (44.00 - 44.00) | |  | **< 0.001** |
|  |  |  |  |  |  |  |  |
| **11** | 3.66 (-21.23 - 28.56) | |  | 54.00 (54.00 - 54.00) | |  | **< 0.001** |
|  |  |  |  |  |  |  |  |

**Supplementary 5:** Longitudinal changes in Mean LV-RVmPA by symptomatic cardiotoxicity status, analyzed by GEE method. A – The mean LV-RVmPA’s curve; B – Table showing the mean of LV-RVmPA’s values; Nº – number; in bold, *p* < 0.05.
